# Supplementary material
Source: Springer Nature journal article supplement (https://www.springermedizin.de/resource/supplementary/12958_2012_1039_MOESM4_ESM.pdf/9566422)
Supplement: MOESM4 [file 9566422]

|                | Random sequence generation (selection bias) | Allocation concealment (selection bias) | Blinding of participants and personnel (performance bias) | Blinding of outcome assessment (detection bias) | Incomplete outcome data (attrition bias) | Selective reporting (reporting bias) | Other bias |
|----------------|---------------------------------------------|-----------------------------------------|-----------------------------------------------------------|-------------------------------------------------|------------------------------------------|--------------------------------------|------------|
| Aboulghar 2008 |                                             |                                         |                                                           |                                                 |                                          |                                      |            |
| Andersen 2002  |                                             |                                         |                                                           |                                                 |                                          |                                      |            |
| Goudge 2010    |                                             |                                         |                                                           |                                                 |                                          |                                      |            |
| Kohls 2012     |                                             |                                         |                                                           |                                                 |                                          |                                      |            |
| Kyrou 2011     |                                             |                                         |                                                           |                                                 |                                          |                                      |            |
| Priehl 1992    |                                             |                                         |                                                           |                                                 |                                          |                                      |            |
